# Supplementary material for: One-pot synthesis of a three-dimensional graphene aerogel supported Pt catalyst for methanol electrooxidation
Source: Royal Society of Chemistry journal article supplement (doi:10.1039/c5ra20503d), 2015-01-01
Supplement: c5ra20503d1.pdf [file c5ra20503d1.pdf]

## Electronic Supplementary Information

### One-pot synthesis of three-dimensional graphene aerogel supported Pt catalyst for methanol electrooxidation

Lei Zhao,<sup>a</sup> Zhen-Bo Wang,<sup>a,\*</sup> Jia-Long Li,<sup>a</sup> Jing-Jia Zhang,<sup>a</sup> Xu-Lei Sui,<sup>a</sup> Li-Mei Zhang<sup>a</sup>

<sup>a</sup> School of Chemical Engineering and Technology, Harbin Institute of Technology, No. 92 West-Da Zhi Street, Harbin, 150001 China. E-mail: wangzhhb@hit.edu.cn; Tel.: +86-451-86417853; Fax: +86-451-86418616

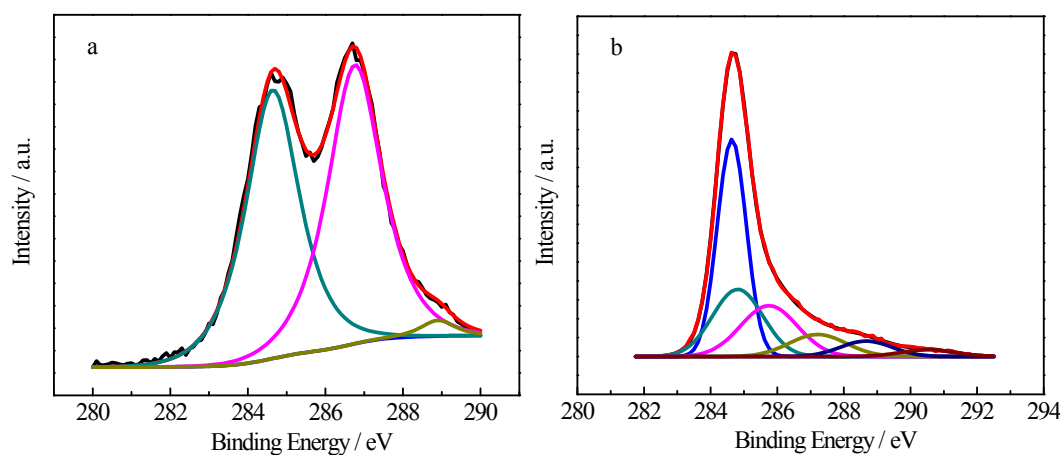

Figure S1 XPS spectra of the C1s in GO (a) and Pt/GA catalyst (b).

**Table S1.** Results of the fits of the C1s spectra, values given in % of the total intensity.

| Sample | C-C<br>284.5 eV | C-O<br>286.7 eV | C=O<br>288.8 eV | Anti $\pi$ bond<br>291.0 eV |
|--------|-----------------|-----------------|-----------------|-----------------------------|
| GO     | 47.92           | 50.33           | 1.75            | --                          |
| Pt/GA  | 64.67           | 19.23           | 13.67           | 2.43                        |

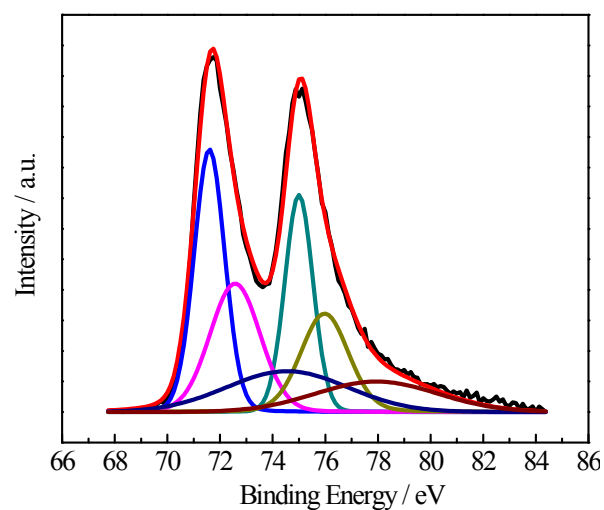

Figure S2 XPS spectra of the Pt 4f in Pt/GA catalyst.

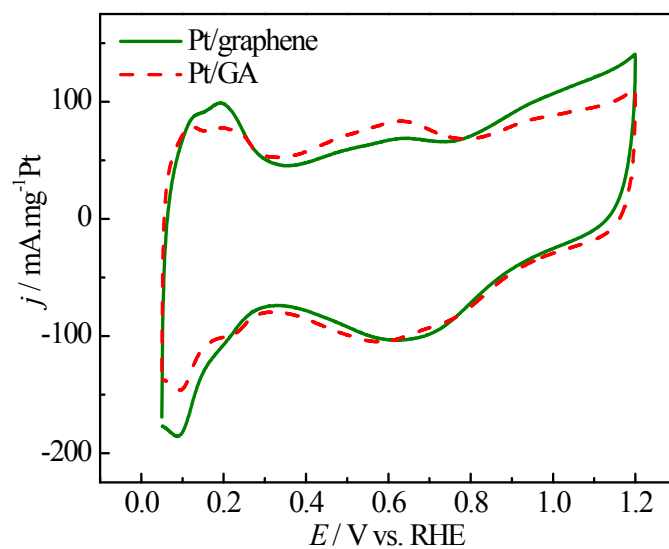

Figure S3 CV of Pt/graphene and Pt/GA catalysts in  $0.5 \text{ mol L}^{-1} \text{ H}_2\text{SO}_4$ . Scanning rate:  $50 \text{ mV s}^{-1}$ ; test temperature:  $25 \text{ }^\circ\text{C}$ .

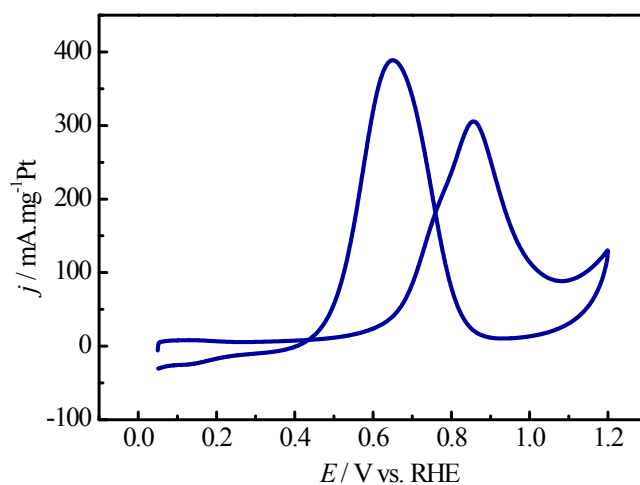

Figure S4 CV of commercial Pt/C in a solution of  $0.5 \text{ mol L}^{-1} \text{ H}_2\text{SO}_4$  containing  $0.5 \text{ mol L}^{-1} \text{ CH}_3\text{OH}$  (b). Scanning rate:  $50 \text{ mV s}^{-1}$ ; test temperature:  $25 \text{ }^\circ\text{C}$ .

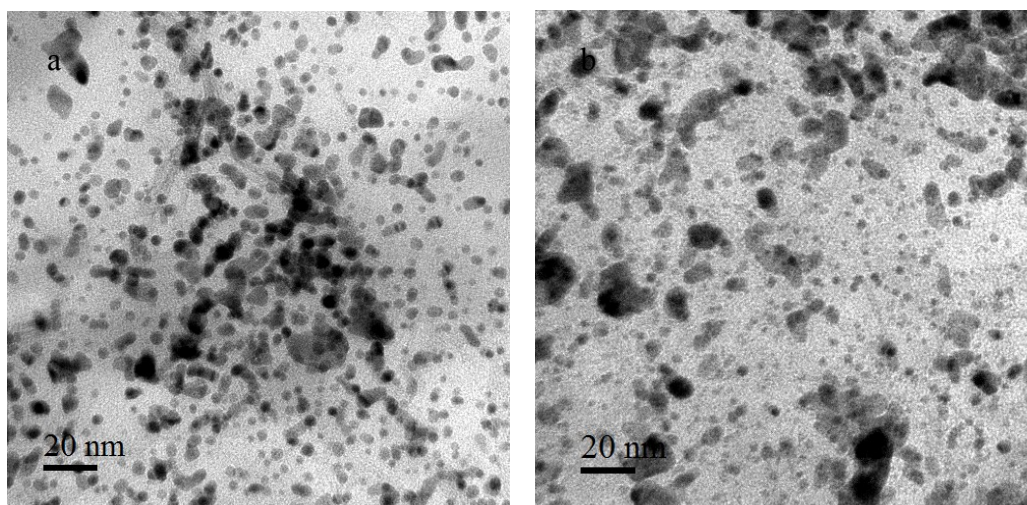

Figure S5 TEM images of the Pt/graphene (a) and Pt/GA (b) after stability test.

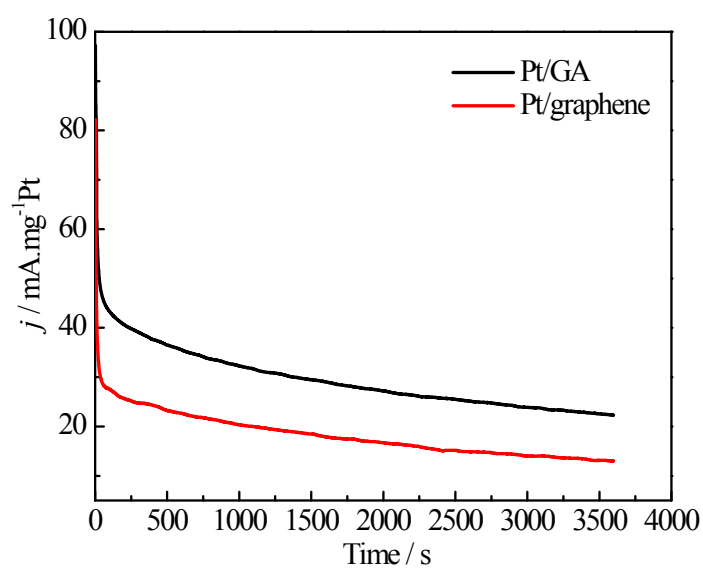

Figure S6 Chronoamperometric curves for Pt/graphene and Pt/GA catalyst in a solution of  $0.5 \text{ mol L}^{-1} \text{ H}_2\text{SO}_4$  containing  $0.5 \text{ mol L}^{-1} \text{ CH}_3\text{OH}$  at a fixed potential of  $0.6 \text{ V vs. RHE}$ .
